# Supplementary material for: The effects of dopaminergic modulation on frequency-specific resting-state EEG patterns in healthy participants
Source: Research Square preprint supplement (doi:10.21203/rs.3.rs-7075484/v1), 2025-07-24
Supplement: Supplementary file 1 [file 79e82c1ebef7da920861b683.docx]

The effect of dopaminergic substances on resting-state EEG connectivity in healthy participants

Alina J. Preuss1,2*

Renate de Bock3*

Amatya J. Mackintosh4

Simon Schuster5

Philipp Sterzer3

Jonas Obleser2,6

Stefan Borgwardt1,2

Christina Andreou1,2


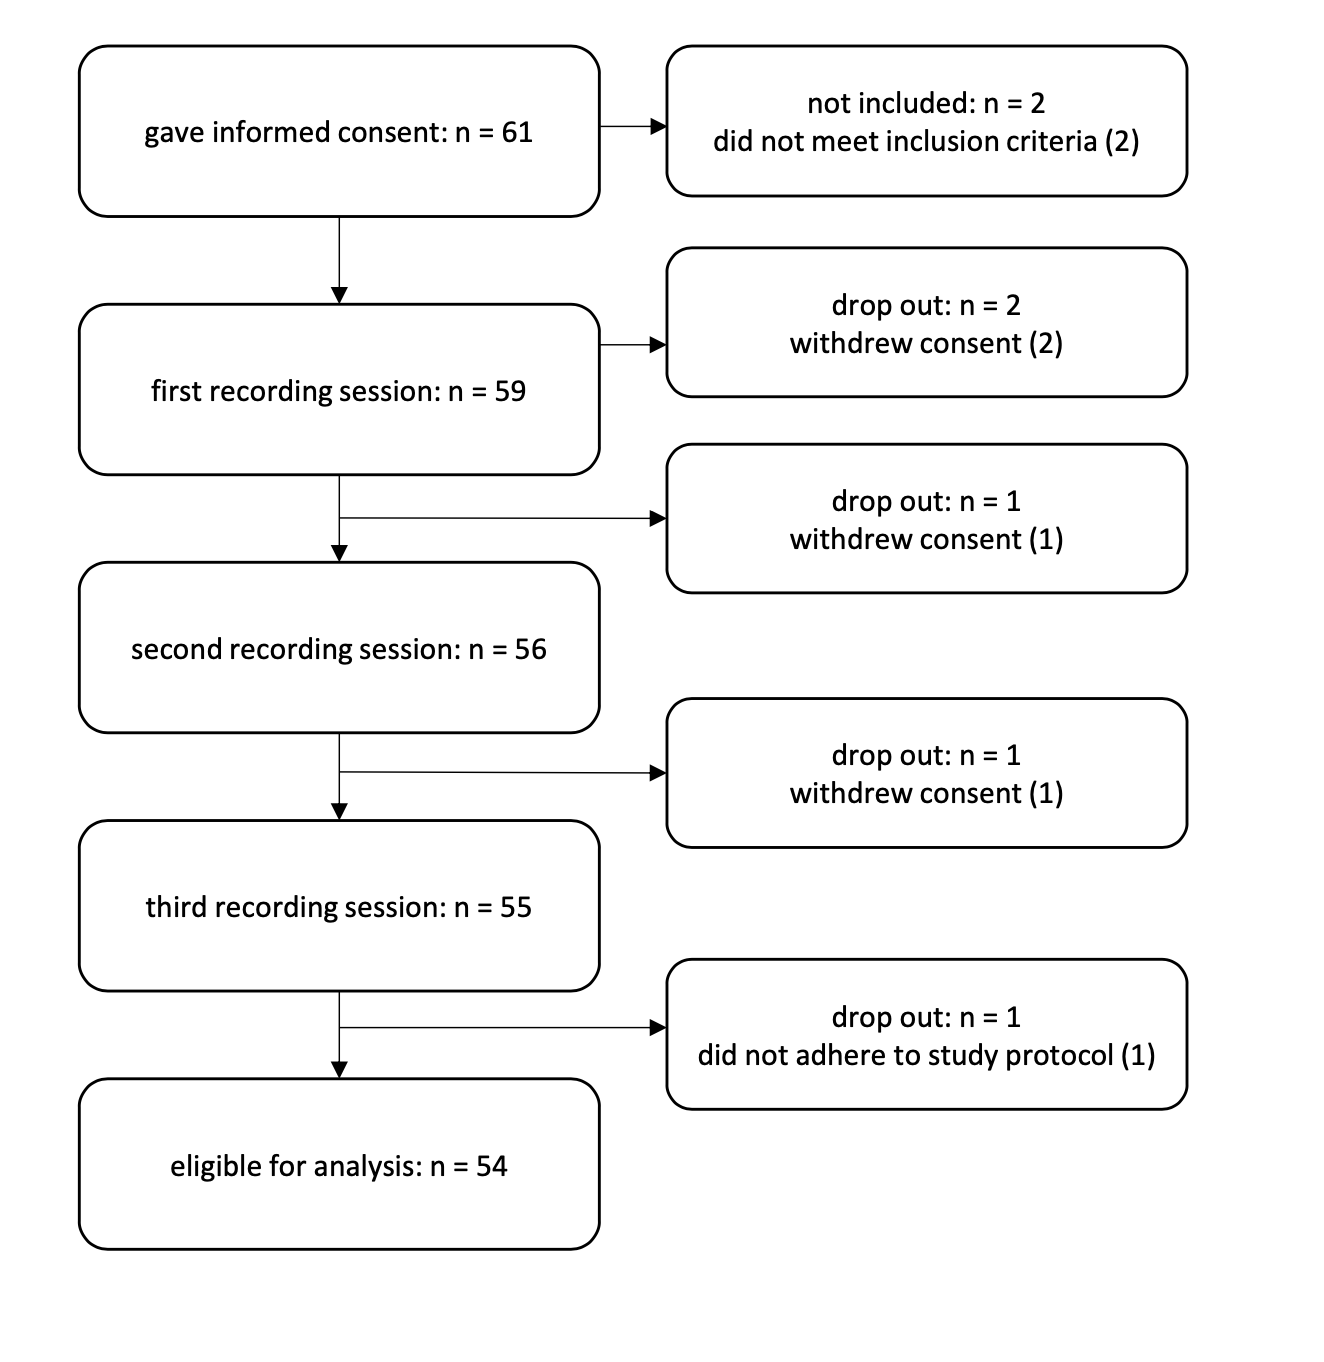


**Figure S1.** Flowchart of participants eligible, recruited, numbers followed up and included in analysis.

**
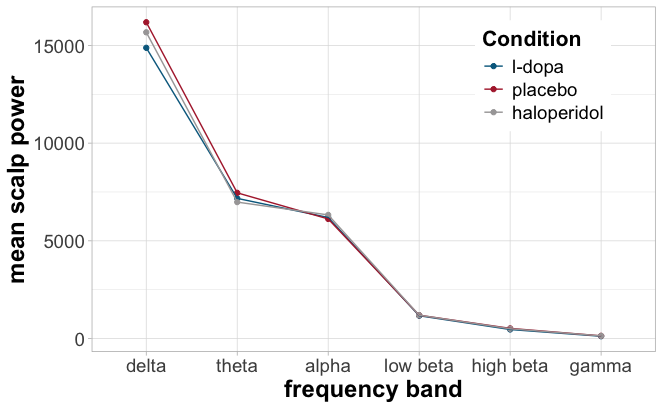
**

**Figure S2.** Mean overall scalp power at each frequency band in L-dopa, haloperidol and placebo conditions.

| MIM | L-dopa | Placebo | Haloperidol |
| --- | --- | --- | --- |
| Delta (3 Hz) | 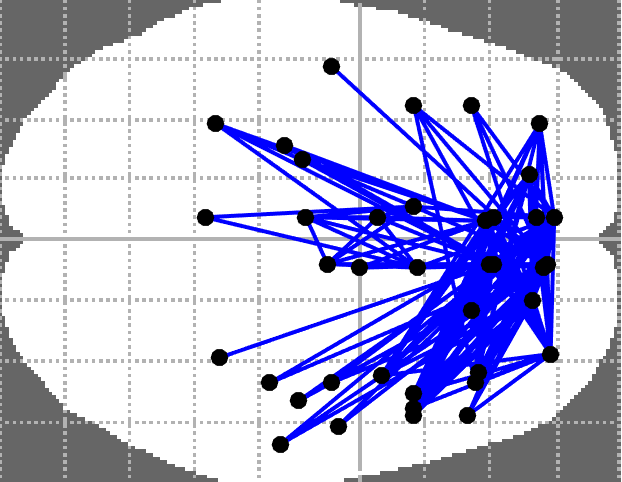 | 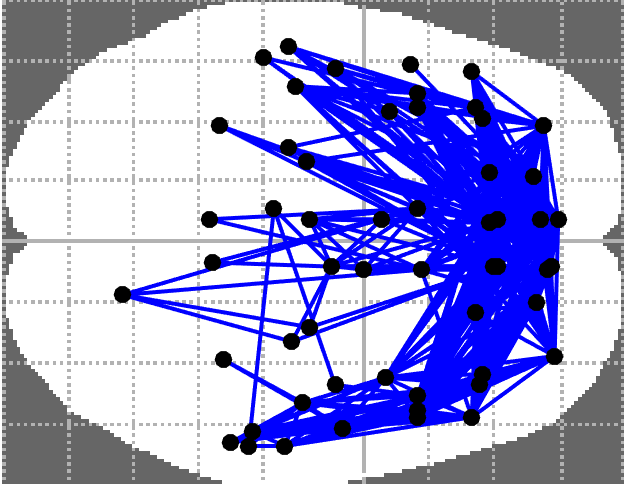 | 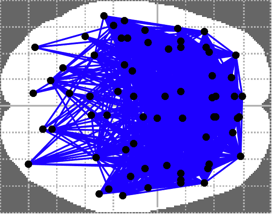 |
| Theta (6 Hz) | 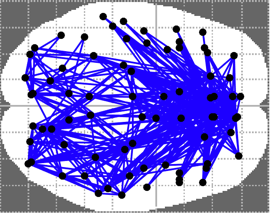 | 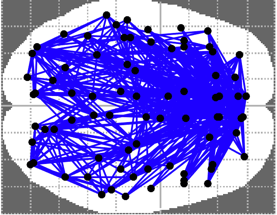 | 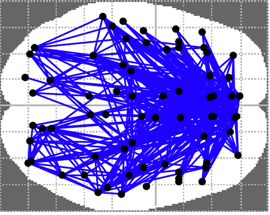 |
| Alpha (10 Hz) | 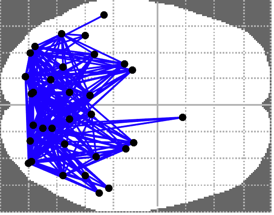 | 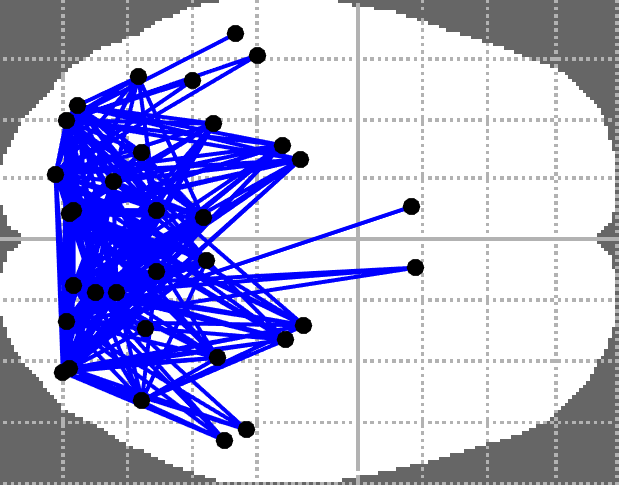 | 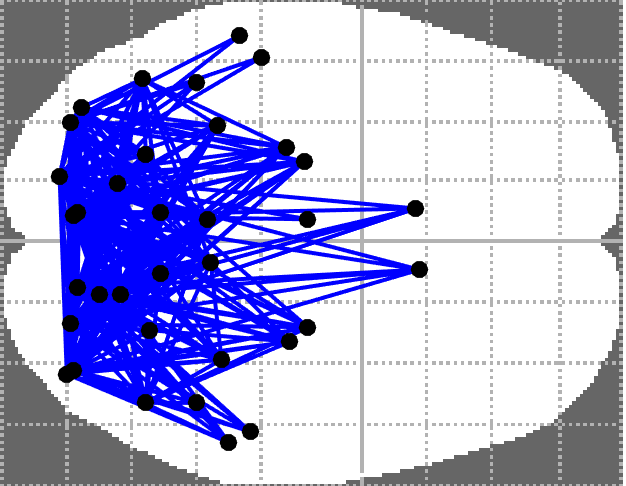 |
| Low beta (16 Hz) | 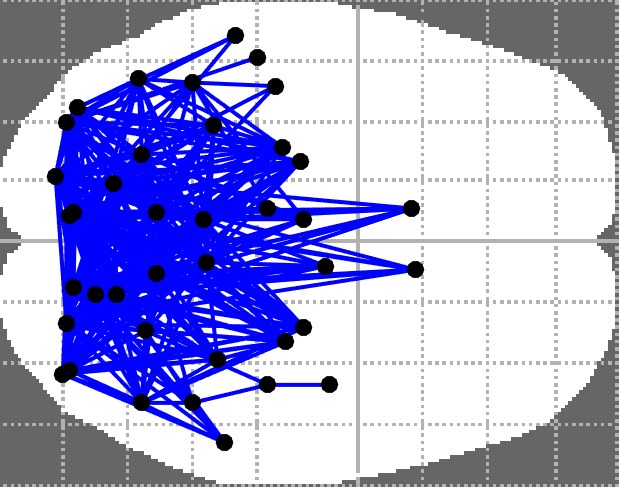 | 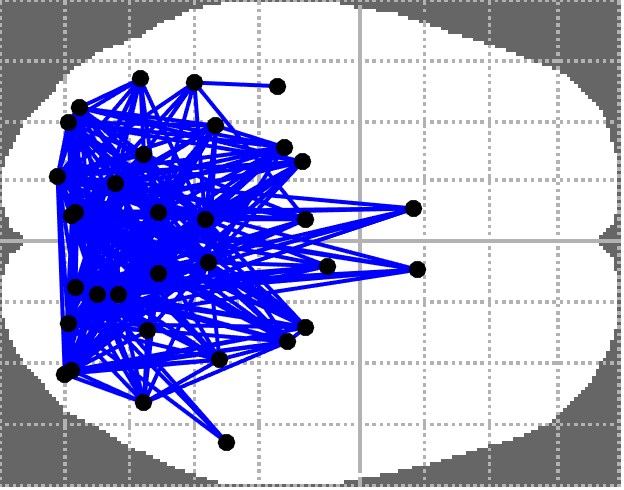 | 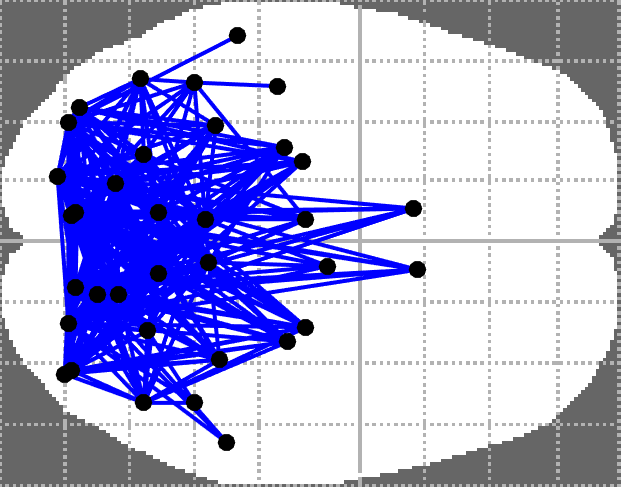 |
| High beta (25 Hz) | 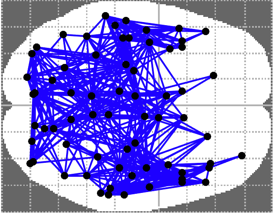 | 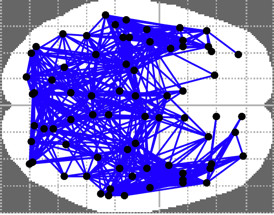 | 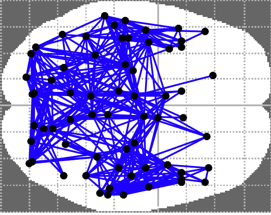 |
| Gamma (40 Hz) | 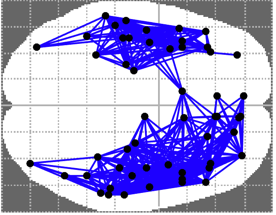 | 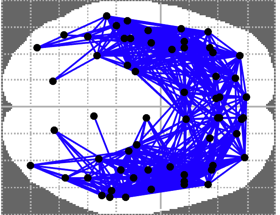 | 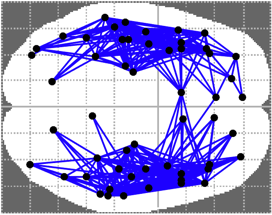 |

**Figure S3**. Multivariate interaction measure (MIM) networks (one sample NBS t-test, 1000 permutations) in each frequency range. The t-threshold was varied across frequencies to maximize network visibility, but is the same across substances for any given frequency. The left side of the brain corresponds to the left hemisphere, and the top of the brain represents the anterior direction.

| ORT | L-dopa | Placebo | Haloperidol |
| --- | --- | --- | --- |
| Delta (3 Hz) | 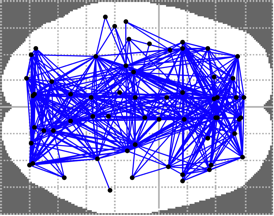 | 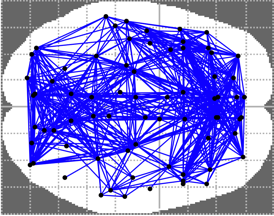 | 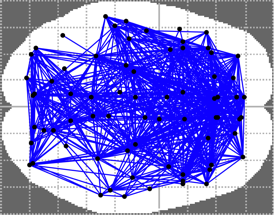 |
| Theta (6 Hz) | 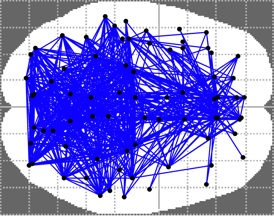 | 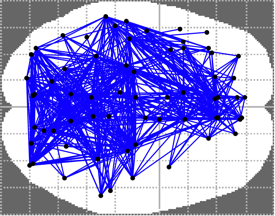 | 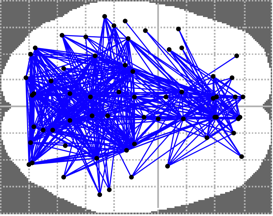 |
| Alpha (10 Hz) | 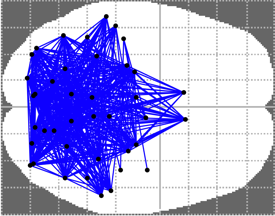 | 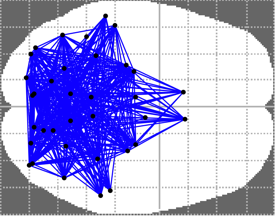 | 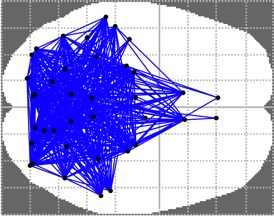 |
| Low beta (16 Hz) | 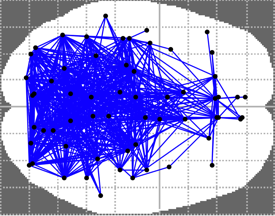 | 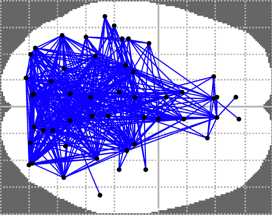 | 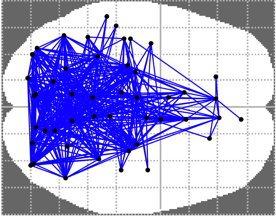 |
| High beta (25 Hz) | 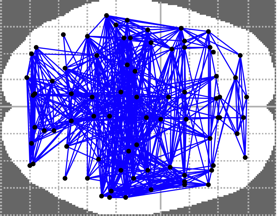 | 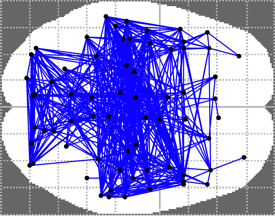 | 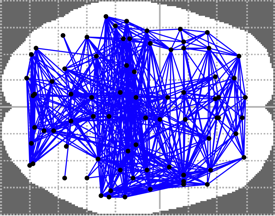 |
| Gamma (40 Hz) | 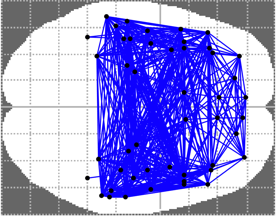 | 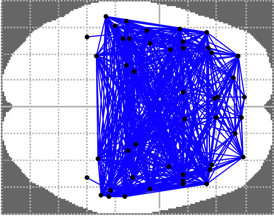 | 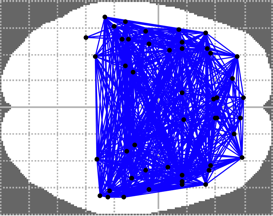 |

**Figure S4**. Orthogonalized power envelope (ORT) networks (one sample NBS t-test, 1000 permutations) in each frequency range. The t-threshold was varied across frequencies to maximize network visibility, but is the same across substances for any given frequency. The left side of the brain corresponds to the left hemisphere, and the top of the brain represents the anterior direction.

**Table S1**. Double-dummy design of the capsule administration

|  | |  | |  | |
| --- | --- | --- | --- | --- | --- |
|  | t0 | | t1 (1.5h after t0) | | t2 (2.5h after t0) |
| **Haloperidol** | Haldol® | | Placebo | | Onset EEG recording |
| **L-dopa** | Placebo | | Madopar® | | Onset EEG recording |
| **Placebo** | Placebo | | Placebo | | Onset EEG recording |

**Table S2.** Brain regions included in significant networks with the number of connections within the network for delta, low-beta, and gamma for MIM.

**Delta**

| Node-Name (according to AALA) | Number of connections |
| --- | --- |
| Frontal_Inf_Tri_L | 1 |
| Frontal_Mid_L | 4 |
| Frontal_Mid_Orb_L | 1 |
| Frontal_Sup_L | 1 |
| Parietal_Inf_L | 2 |
| Postcentral_L | 3 |
| Precentral_L | 1 |
| SupraMarginal_R | 1 |

**Low-Beta**

| Node-Name (according to AALA) | Number of connections |
| --- | --- |
| Cingulum_Mid_L | 1 |
| Paracentral_Lobule_L | 1 |
| Paracentral_Lobule_R | 1 |
| Postcentral_L | 1 |
| Rolandic_Oper_R | 4 |

**Gamma**

| Node-Name (according to AALA) | Number of connections |
| --- | --- |
| Cingulum_Ant_L | 10 |
| Cingulum_Ant_R | 3 |
| Cingulum_Mid_R | 1 |
| Cingulum_Post_L | 2 |
| Frontal_Inf_Oper_L | 2 |
| Frontal_Inf_Orb_L | 4 |
| Frontal_Inf_Tri_L | 3 |
| Frontal_Med_Orb_L | 6 |
| Frontal_Med_Orb_R | 4 |
| Frontal_Mid_L | 8 |
| Frontal_Mid_Orb_L | 16 |
| Frontal_Sup_L | 3 |
| Frontal_Sup_Medial_L | 6 |
| Frontal_Sup_Medial_R | 6 |
| Frontal_Sup_Orb_L | 3 |
| Fusiform_L | 3 |
| Heschl_L | 3 |
| Hippocampus_L | 8 |
| Insula_L | 2 |
| Olfactory_L | 2 |
| Paracentral_Lobule_L | 2 |
| Paracentral_Lobule_R | 2 |
| Parahippocampal_L | 5 |
| Postcentral_L | 4 |
| Precentral_L is | 2 |
| Rectus_L | 4 |
| Rectus_R | 3 |
| Rolandic_Oper_L | 3 |
| Supp_Motor_Area_L | 1 |
| Supp_Motor_Area_R | 1 |
| Temp_Pole_Mid_L | 5 |
| Temp_Pole_Sup_L | 3 |
| Temporal_Sup_L | 1 |

**Table S3.** Brain regions included in significant networks with the number of connections within the network for alpha and low-beta for orthogonalized power envelopes.

**Alpha**

| Node-Name (according to AALA) | Number of connections |
| --- | --- |
| Frontal_Inf_Oper_R | 2 |
| Frontal_Mid_R | 1 |
| Frontal_Sup_L | 1 |
| Postcentral_L | 3 |
| Precentral_L | 1 |
| Rolandic_Oper_R | 2 |

**Low-Beta**

| Node-Name (according to AALA) | Number of connections |
| --- | --- |
| Angular_L | 1 |
| Cingulum_Mid_L | 8 |
| Cingulum_Mid_R | 7 |
| Cingulum_Post_L | 3 |
| Cingulum_Post_R | 3 |
| Cuneus_L | 2 |
| Frontal_Inf_Oper_R | 15 |
| Frontal_Inf_Orb_L | 4 |
| Frontal_Mid_R | 11 |
| Frontal_Sup_L | 16 |
| Frontal_Sup_R | 3 |
| Frontal_Sup_Medial_R | 1 |
| Frontal_Sup_Orb_L | 1 |
| Fusiform_L | 1 |
| Heschl_L | 7 |
| Heschl_R | 11 |
| Hippocampus_L | 4 |
| Hippocampus_R | 1 |
| Insula_R | 13 |
| Lingual_L | 1 |
| Occipital_Mid_L | 2 |
| Occipital_Sup_L | 3 |
| Olfactory_L | 2 |
| Olfactory_R | 2 |
| Paracentral_Lobule_L | 6 |
| Paracentral_Lobule_R | 4 |
| Parahippocampal_L | 2 |
| Parahippocampal_R | 1 |
| Parietal_Inf_L | 6 |
| Parietal_Inf_R | 14 |
| Parietal_Sup_L | 6 |
| Parietal_Sup_R | 21 |
| Postcentral_L | 16 |
| Postcentral_R | 11 |
| Precentral_L | 6 |
| Precentral_R | 16 |
| Precuneus_L | 7 |
| Precuneus_R | 5 |
| Rolandic_Oper_L | 2 |
| Rolandic_Oper_R | 17 |
| Supp_Motor_Area_L | 11 |
| Supp_Motor_Area_R | 6 |
| SupraMarginal_L | 4 |
| SupraMarginal_R | 5 |
| Temporal_Sup_R | 2 |
